# Supplementary material for: A Digital Framework to Build, Visualize and Analyze a Gene Expression Atlas with Cellular Resolution in Zebrafish Early Embryogenesis
Source: PLOS journal article supplement (doi:10.1371/journal.pcbi.1003670), 2014-06-19
Supplement: S35 (10.1371/journal.pcbi.1003670.s035) [file journal.pcbi.1003670.s035]

301 Moved Permanently

# Moved Permanently

The document has moved here.

---

Apache Server at www.ploscompbiol.org Port 80
